# Supplementary material for: Usability Evaluation of a Web-Based Support System for People With a Schizophrenia Diagnosis
Source: PubMed Central journal article supplement (PMC3374538; doi:10.2196/jmir.1921), 2012-02-06
Supplement: jmir_v14i1e24_app2.pdf [file jmir_v14i1e24_app2.pdf]

Home Mijn Wegweis AA LianvdK

# [Wegweis]

Beta Zoek in adviezen

**Feedback**

**Zoekresultaten**

## Heb je lichamelijke klachten?

⌵ Sommige lichamelijke klachten kunnen een bijwerking zijn van je medicatie

In de [Multidisciplinaire Richtlijn](#) staat het volgende over bijwerkingen:

"Medicijnen zijn niet alleen lichaamsprocessen met bij Bij een verkeerde (te hoge) vergroot door onjuist gebruik van medicatie, of door een mogelijke wisselwerking met andere medicijnen die u gebruikt of met alcohol en drugs.

**Multidisciplinaire Richtlijn**  
Dit is een document waarin beschreven staat hoe behandelaars psychische klachten het beste kunnen behandelen.

Mogelijke bijwerkingen van antipsychotica zijn:

- Extrapiramidale symptomen. Dit zijn bewegingsstoornissen (on/overbeweeglijkheid) door spierstijfheid of onwillekeurige bewegingen.
- Gewichtstoename en overgewicht,
- Diabetes en vetstofwisselingsstoornissen,
- Seksuele functiestoornissen (zoals impotentie),
- Effecten op de aanmaak van bloedcellen en op het immuunsysteem (verminderde weerstand)
- Verminderde hartwerking"

⌵ Bespreek je klachten eens met je psychiater **Pee Siegiater**

Hij kan kijken of de klachten te maken hebben met je medicatie. Misschien kan de dosering van je medicatie aangepast worden, of kun je overstappen op andere medicatie.

Ook als de lichamelijke klachten niet worden veroorzaakt door medicatie kan je psychiater **Pee Siegiater** je meer vertellen over wat er aan de hand kan zijn. En wat je mogelijk aan kunt doen.

Translation:

Do you have any physical complaints?

Some physical problems can be a side effect of your medication.

The multidisciplinary guideline [Multidisciplinary Guideline: this is a document which describes how clinicians should treat psychiatric problems] states the following:

"Medication does not only affect those parts of the body where an effect is desired. As a side effect, they also affect other body processes. A wrong or too high dosage increases the risk of side effects. The risk of side effects also increases when medication is not used properly, when medications are combined, or when used in combination with alcohol and drugs. Possible side effects of antipsychotics are:

- Extra pyramidal symptoms. These are movement disorders characterized by stiffness of the muscles or involuntary movements.
- Weight gain and obesity
- Diabetes and metabolic syndromes
- Sexual dysfunctions
- Effects on the production of blood cells and on the immune system (decreased resistance)
- Decreased heart function"

Feel free to discuss your symptoms with your psychiatrist Pee Siegiater

He can tell you whether your physical symptoms are related to the use of your medication. Perhaps the dosage of your medication can be adjusted, or you can change medication. If your symptoms are caused by something other than your medication, your psychiatrist Pee Siegiater can also tell you more about possible causes and what you can do about it.
